# Supplementary material for: Imaging nucleus viscosity and G-quadruplex DNA in living cells using a nucleus-targeting two-photon fluorescent probe
Source: Royal Society of Chemistry journal article supplement (doi:10.1039/c8an01643g), 2018-01-01
Supplement: c8an01643g1.pdf [file c8an01643g1.pdf]

# Imaging Nucleus Viscosity and G-quadruplex DNA in Living Cells by a Nucleus-Targeting Two-Photon Fluorescent Probe

Wan Sun,<sup>a</sup> Jing-Xue Cui,<sup>a</sup> Le-Le Ma,<sup>a</sup> Zhong-Lin Lu,<sup>\*a</sup> Bing Gong,<sup>a</sup> Lan He,<sup>\*b</sup> and  
Ruibing Wang<sup>\*c</sup>

<sup>a</sup> Key Laboratory of Radiopharmaceuticals, Ministry of Education, College of Chemistry, Beijing Normal University, Xijiekouwai Street 19, Beijing 100875, China

<sup>b</sup> National Institute for Food and Drug Control, Beijing 100050, China

<sup>c</sup> State Key Laboratory of Quality Research in Chinese Medicine, and Institute of Chinese Medical Sciences, University of Macau, Taipa, Macau, China

## Contents

1. Materials and methods
2. Scheme of TP-2Bz synthesis
3. Fig. S1 Absorption spectra of TP-2Bz in different water/glycerol solvent ( $c = 1.0 \times 10^{-5}$ )
4. Fig. S2 Absorption spectra and plot of intensity against the concentration of TP-2Bz in pure PBS buffer (pH = 7.4), respectively.
5. Fig. S3 The fluorescent intensities for TP-2Bz at varied pH values
6. Fig. S4 Cytotoxicity of TP-2Bz in HepG2 and A549 (The data are given as mean  $\pm$  SD ( $n = 6$ ))
7. Fig. S5 Two-photo excited fluorescence images of TP-2Bz by 30 minutes of laser radiation ( $\lambda_{\text{ex}} = 800 \text{ nm}$ ,  $\lambda_{\text{em}} = 600\text{-}670 \text{ nm}$ )
8. Molecular docking studies
9. References
10. Spectra data of TP-2Bz

## 1. Materials and methods

All chemicals were purchased as reagent grade materials and used without further purification. The solvents were dried and distilled according to standard procedures.

Table S1. Names and sequences of different GQ DNA, ssDNA, and dsDNA

| Name   | Sequence (5'→3')             | Structure in K <sup>+</sup> solution |
|--------|------------------------------|--------------------------------------|
| c-kit3 | GGCGAGGAGGGGCGTGGCCGGC       | Antiparallel G4 DNA                  |
| htg21  | GGGTTAGGGTTAGGGTTAGGG        | Antiparallel G4 DNA                  |
| c-kit1 | AGGGAGGGCGCTGGGAGGAGGG       | Parallel G4 DNA                      |
| c-kit2 | CGGGCGGGCGCGAGGGAGGGT        | Parallel G4 DNA                      |
| c-myc  | GAGGGTGGGGAGGGTGGGGAAG       | Parallel G4 DNA                      |
| htg22  | AGGGTTAGGGTTAGGGTTAGGG       | Hybrid-type G4 DNA                   |
| telo24 | TTAGGGTTAGGGTTAGGGTTAGG<br>G | Hybrid-type G4 DNA                   |
| mpu22  | TGAGCGTGGCGAGCGTGGCGAA       | Single-stranded DNA                  |
| ct-DNA |                              | Double-stranded DNA                  |

The G-quadruplex DNA solutions were annealed by heating telo24 in 50 mM Tris buffer (pH 7.2) and 50 mM KCl, at 95 °C for 5 min and by cooling at 2 – 4 °C for 10 min.

<sup>1</sup>H and <sup>13</sup>C NMR spectra were recorded using a Bruker Avance III 400 MHz spectrometer and 500MHz spectrometer (Bruker Co., Germany). Coupling constants *J* are given in Hz. High resolution mass spectra were acquired using a waters LCT Premier XE spectrometer (Waters, Milford, MA, USA).

Absorption spectra were recorded with a Varian Cary-50 UV–Vis spectrophotometer (Agilent Technologies, USA). Fluorescence spectra were recorded with a Cary Eclipse Fluorescence Spectrophotometer (Agilent Technologies, USA) equipped with a 1 cm × 1 cm quartz cell.

TPA cross-sections ( $\delta$ ) of the samples were obtained by the two-photon excited fluorescence (TPEF) method with a femtosecond laser pulse and a Ti : sapphire system (760 – 880 nm, 80 MHz, SP-5W, Spectra-Physics, America), as the light source. The concentration of the sample solution was  $1.0 \times 10^{-5}$  M. Thus, the  $\delta$  values of samples were determined using Equation (1).

$$\delta_s = \delta_r \cdot F_s \cdot \Phi_r \cdot C_r \cdot n_r / F_r \cdot \Phi_s \cdot C_s \cdot n_s \quad (1)$$

where the subscripts “s” and “r” represent the sample and reference (here, Rhodamine B in ethanol solution at a concentration of  $1.0 \times 10^{-5}$  mol/L was used as a reference), respectively. F is the overall fluorescence collection efficiency intensity of the fluorescence signal collected by the Fluorescence Spectrophotometer.  $\Phi$ , n and c are the quantum yield of the fluorescence, the refractive index of solvent, and the concentration of the solution, respectively.

Fluorescent images were acquired on Olympus FV1200 and Olympus FV1200MPE. Image data acquisition and processing was performed using Olympus LSM Image Browser, Olympus LSM Image Expert and Image J. All measurements were in air at room temperature.

## 2. Scheme of TP-2Bz Synthesis

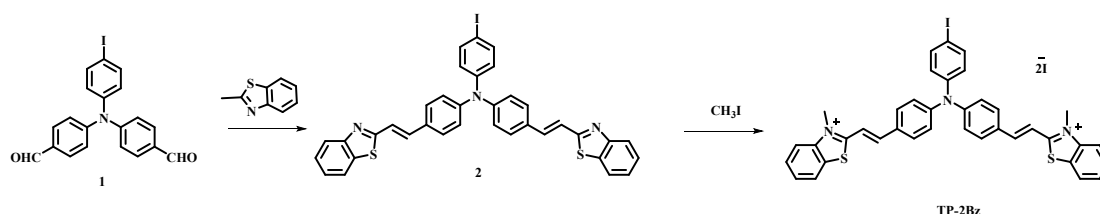

**Scheme S1** The synthetic pathway toward **TP-2Bz**

### 3. Fig. S1

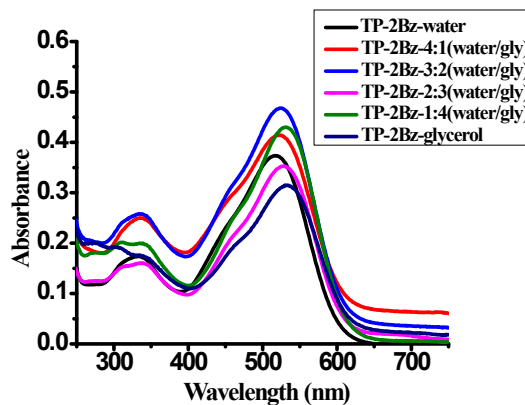

**Fig. S1** Absorption spectra of **TP-2Bz** in different water/glycerol solvent ( $c = 1.0 \times 10^{-5}$ )

### 4. Fig. S2

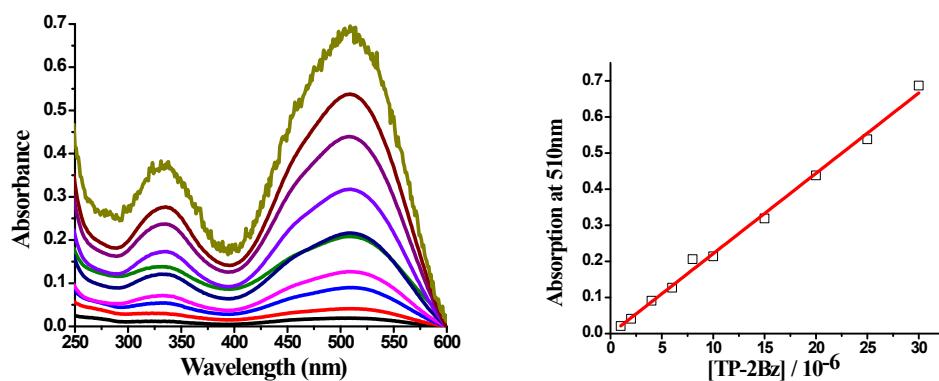

**Fig. S2** absorption spectra and plot of the intensity at 510 nm against the concentration of **TP-2Bz** in pure PBS buffer (pH = 7.4), respectively.

5. Fig. S3

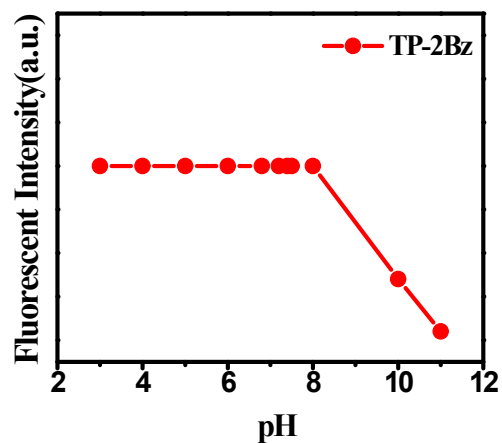

Fig. S3 The fluorescent intensities of TP-2Bz at various pH values at 650nm

6. Fig. S4

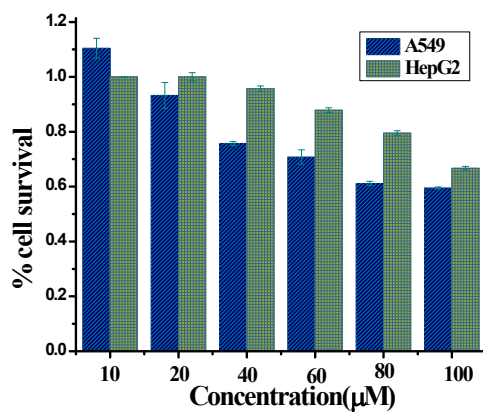

Fig. S4 Cytotoxicity of TP-2Bz in HepG2 and A549 cell lines (The data are given as mean  $\pm$  SD ( $n = 6$ )).

## 7. Fig. S5

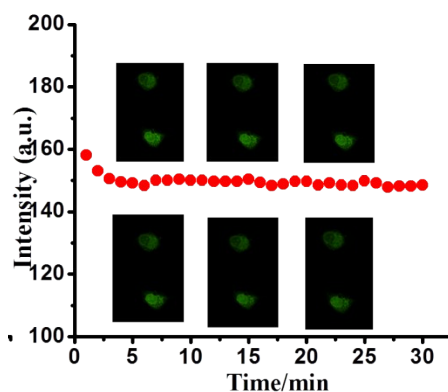

**Fig. S5** Two-photo excited fluorescence images of **TP-2Bz** by 30 min of laser radiation ( $\lambda_{\text{ex}} = 800$  nm,  $\lambda_{\text{em}} = 600\text{-}670$  nm).

## 8. Molecular docking studies

Molecular docking calculations were performed using the Auto dock 4.0 software, which has been reported to be of high accuracy of prediction<sup>[1]</sup>. The crystal structure (NDB: 2JPZ) of telo 24 GQ DNA fragment (base sequences TTAGGGTTAGGGTTAGGGTTAGGGTT) were downloaded from RCSB Protein Data Bank.<sup>[2]</sup> The redundant solvent molecules and ions were removed from the crystal structure.

The initial structure of **TP-2Bz** is modeled in Gauss03, and optimized at B3LYP/6-31g (d, p).

**Table S2** The docked energy of docking probes

| Molecule      | docked energy<br>(Kcal/mol) |
|---------------|-----------------------------|
| <b>TP-2Bz</b> | -7.96                       |
|               | -7.35                       |
|               | -7.62                       |
|               | -7.37                       |
|               | -7.32                       |
|               | -7.34                       |
|               | -7.32                       |
|               | -7.29                       |
|               | -7.27                       |
|               | -7.01                       |

Docked energy optimized: docked interaction score (negative of the energy) after optimizing the hydrogen position at the ligand and on the receptor in the vicinity of the ligand.

## 9. References

- [1] O. Trott, A.J. Olson, *J. Comput. Chem.* 2010, **31**, 455–461.
- [2] J. Dai, M. Carver, C. Punchihewa, R. A. Jones, D. Yang, *Nucleic Acids Res.* 2007, **35**, 4927–4940.

## 10. Spectra data of TP-2Bz

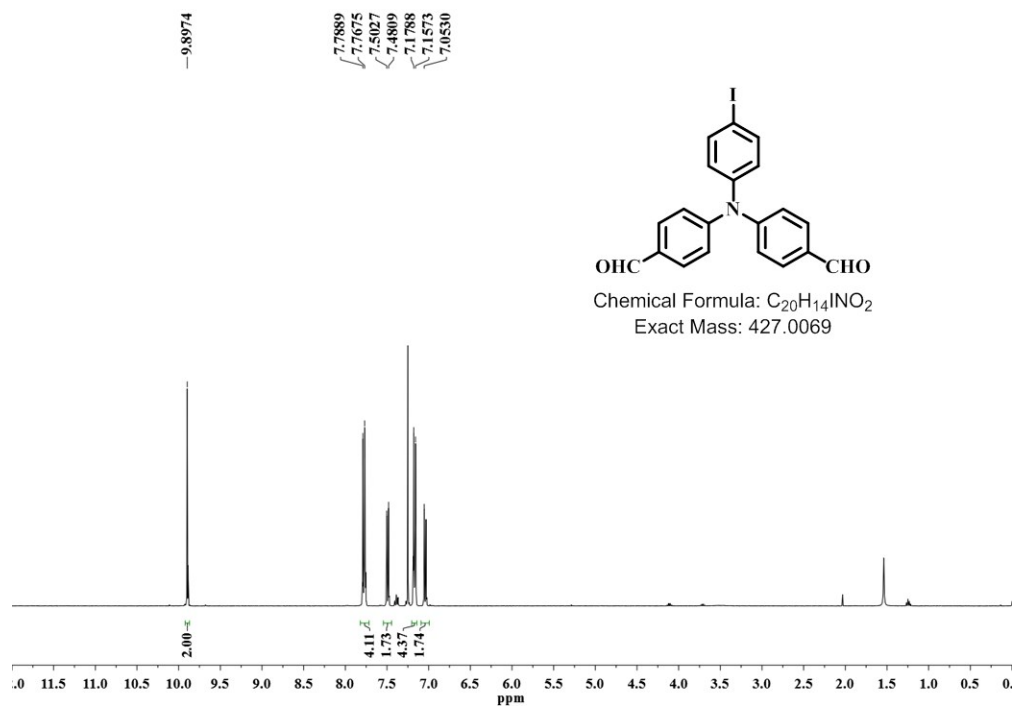

Fig S6  $^1H$  NMR (400 MHz,  $CDCl_3$ ) spectrum of 1

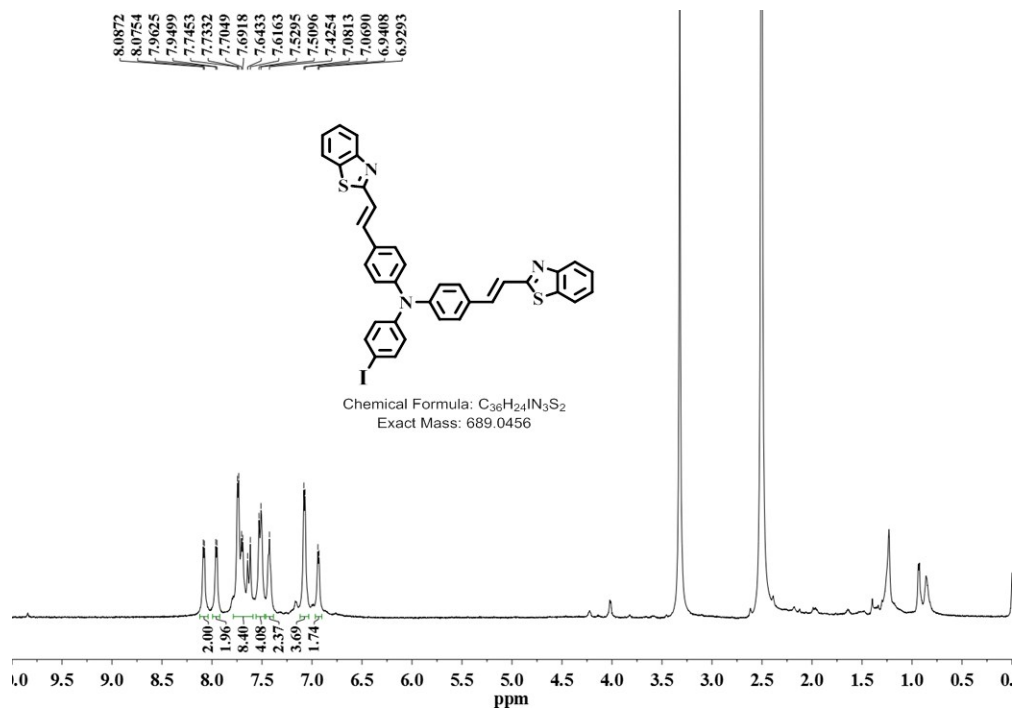

Fig S7  $^1H$  NMR (400 MHz,  $DMSO-d_6$ ) spectrum of 2



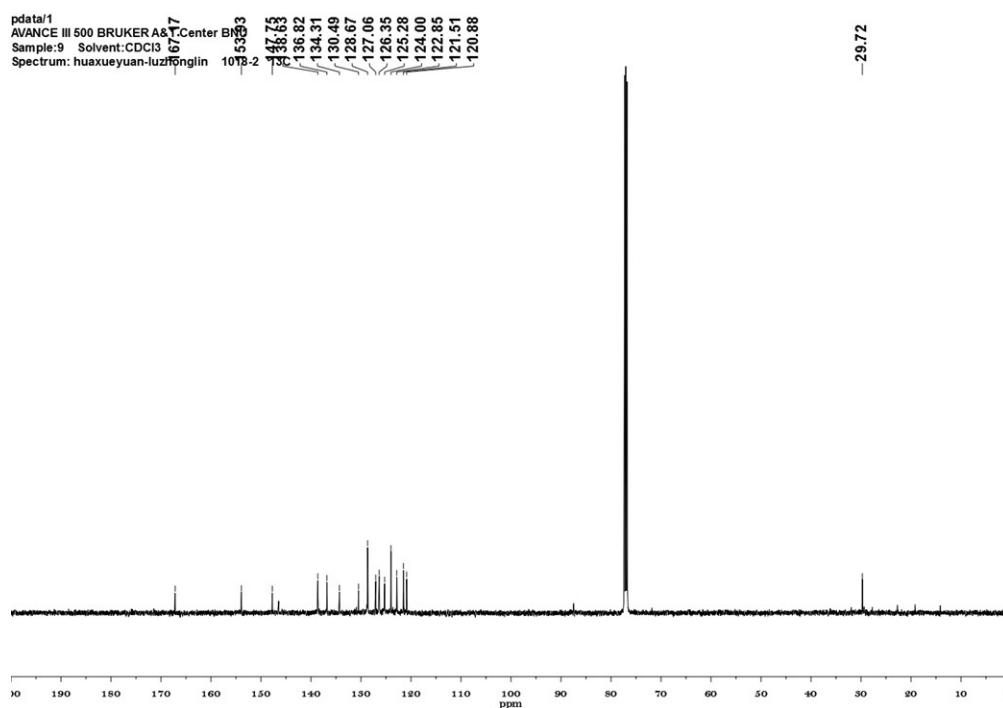

**Fig S8** <sup>13</sup>C NMR (126 MHz, CDCl<sub>3</sub>) spectrum of **2**

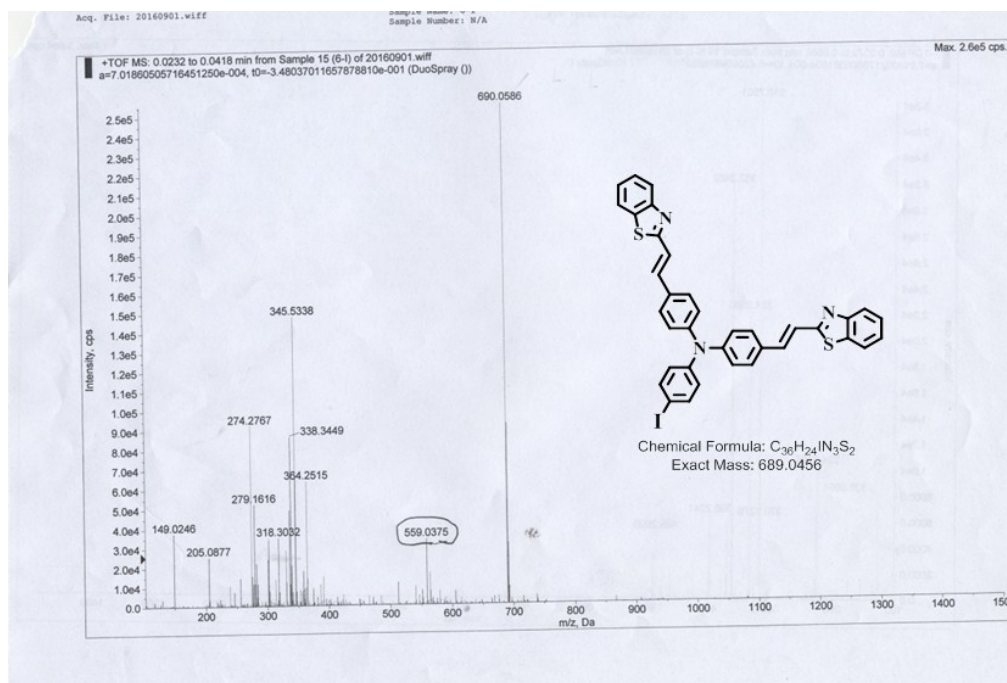

**Fig S9** The MS-ESI spectrum of **2**

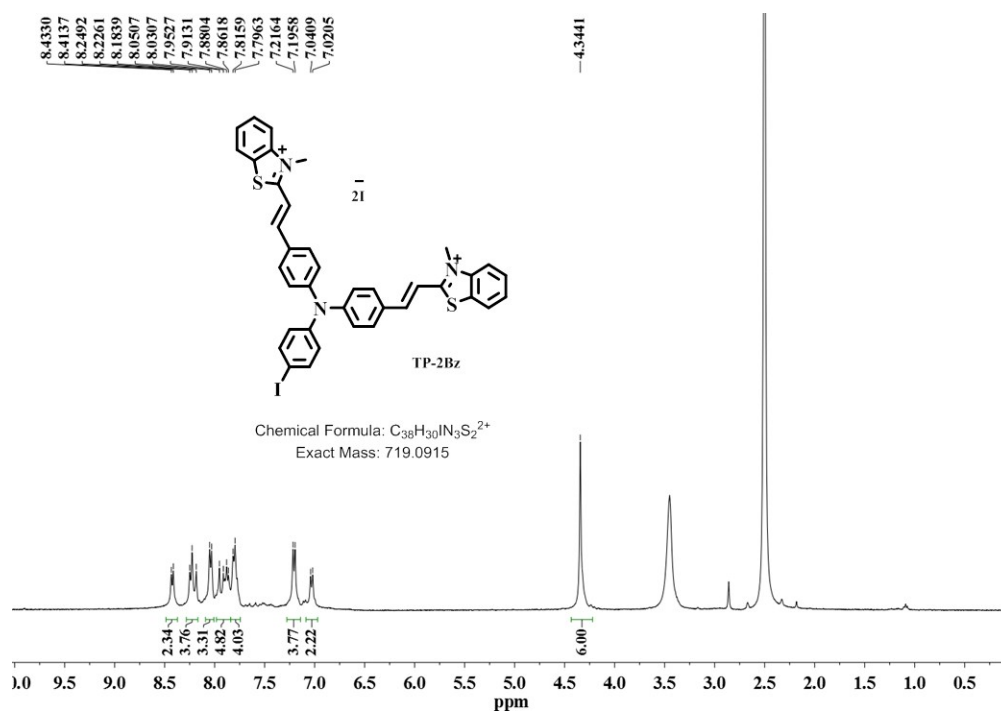

**Fig S10**  $^1H$  NMR (400 MHz, DMSO- $d_6$ ) spectrum of TP-2Bz

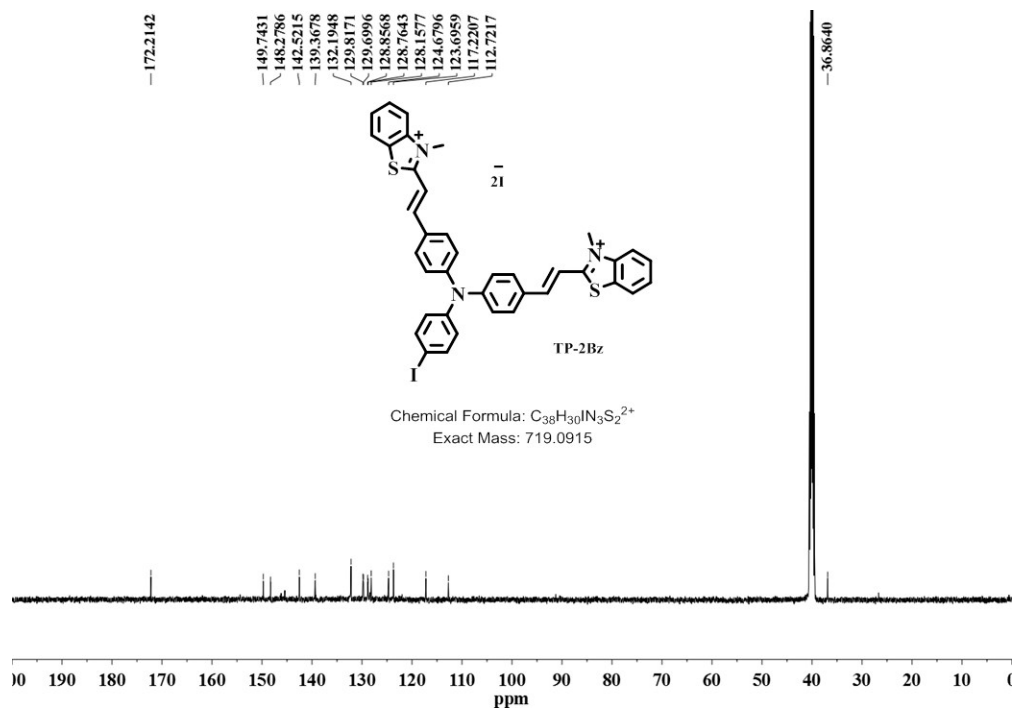

**Fig S11**  $^{13}C$  NMR (400 MHz, DMSO- $d_6$ ) spectrum of TP-2Bz

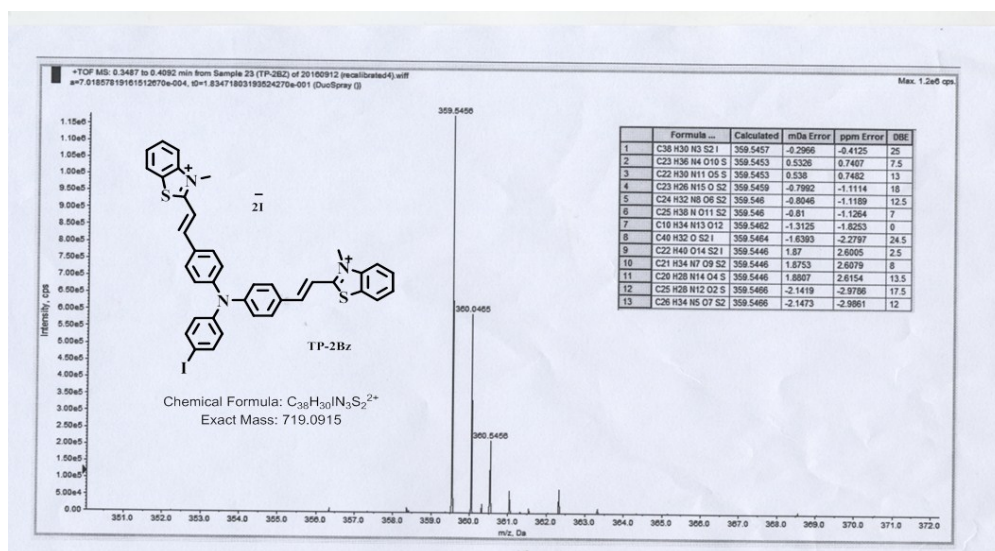

**Fig S12** The HRMS-ESI spectrum of TP-2Bz
